# Supplementary material
Source: PubMed Central journal article supplement (PMC3041642)
Supplement: NIHMS271064-supplement-Supp1.pdf [file NIHMS271064-supplement-Supp1.pdf]

## **Supplemental Material**

### **$\alpha$ -Synuclein Negatively Regulates PKC $\delta$ Expression to Suppress Apoptosis in Dopaminergic Neurons by Reducing p300 HAT Activity**

**Authors:** Huajun Jin, Arthi Kanthasamy, Anamitra Ghosh, Yongjie Yang, Vellareddy  
Anantharam, and Anumantha Kanthasamy

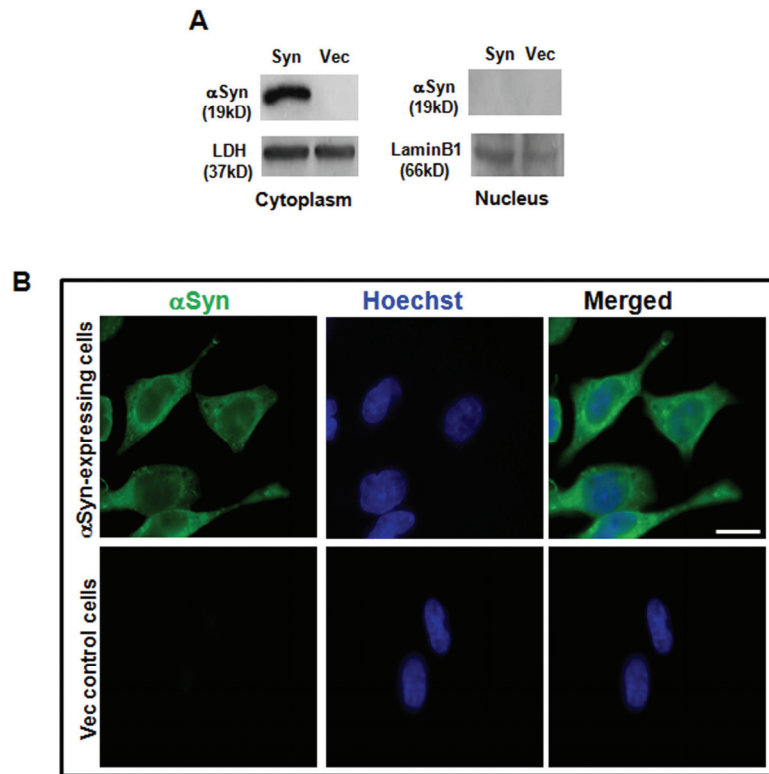

**Supplemental Figure 1.  $\alpha$ -Synuclein was exclusively located in the cytoplasm in  $\alpha$ syn-expressing N27 cells.** *A*, Cytoplasmic and nuclear extracts from  $\alpha$ syn-expressing (Syn) and vector control (Vec) N27 cells were prepared and subjected to immunoblotting analysis of  $\alpha$ syn. LDH (cytoplasmic fraction) and Lamin B1 (nuclear fraction) were used as loading controls. *B*, Stained cells were mounted on slides and visualized under a Nikon TE2000 fluorescence microscope. Images were obtained with a SOPT digital camera. A representative image of  $\alpha$ syn immunostaining (green) and Hoechst staining (blue) is shown. Staining of  $\alpha$ syn-expressing (top panels) and vector control (bottom panels) cells with  $\alpha$ syn reveals immunoreactivity specificity in the cytoplasm but not in the nucleus of  $\alpha$ syn-expressing cells. Scale bar, 10 $\mu$ m.

**A**

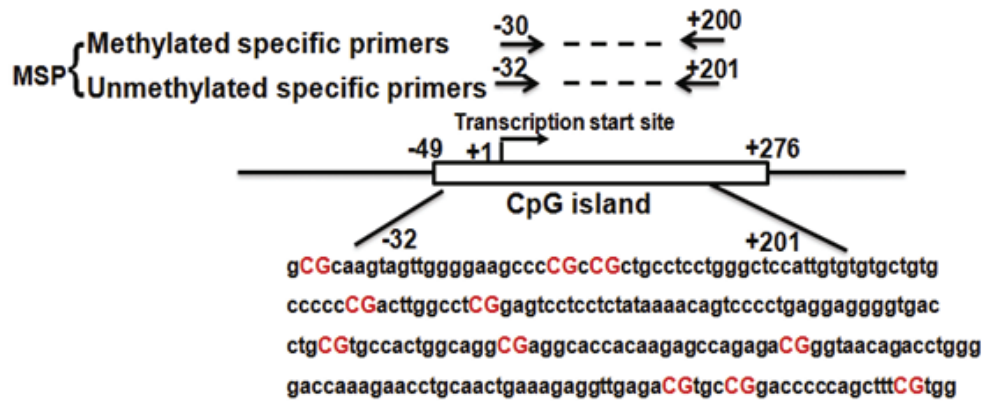

**B**

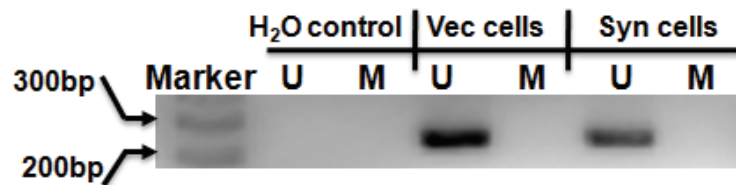

**Supplemental Figure 2.  $\alpha$ -Synuclein does not affect the methylation status of PKC $\delta$  promoter.** *A*, Schematic map of the putative promoter-associated CpG island region showing the location of MSP primers and the sequence of the region studied by MSP. The CpG dinucleotide is shown in red capital letters. *B*, MSP analysis of methylation status in PKC $\delta$  promoter. Bisulfite-modified DNA was used for MSP with primers specific for methylated (M) and unmethylated (U) DNA. Water blank was used as a negative control.

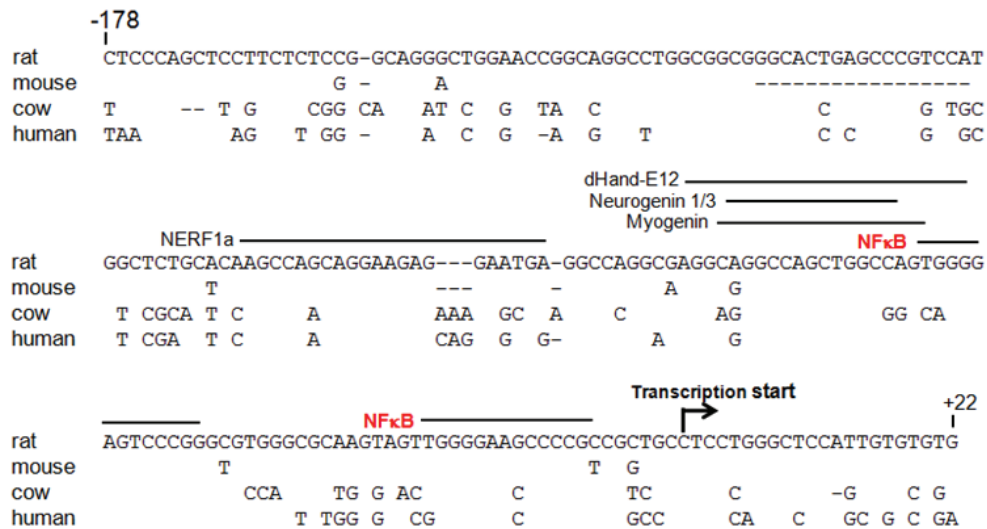

**Supplemental Figure 3. Sequence alignment of the proximal PKCδ promoter.**

The proximal rat PKCδ promoter sequence (-178 to +22, relative to the transcription start site) was aligned with the homologous sequences from the mouse, human, and cow genome using a DiAlign professional program. Sequence differences are indicated and gaps introduced to maximize homology are marked by dashes. The highly conserved TFBSs are labeled, and the NFκB sites are highlighted in red.

**Supplemental Table 1: List of primer sequences used in the study.**

| Primer            | Sequence (5'-3')                   | Amplicon |
|-------------------|------------------------------------|----------|
| PKC $\delta$ Fg   | GTCTATCTCGAGCACTCTCCTGAAGCCCACCATG | 1901     |
| PKC $\delta$ Rg   | GTCTATAAGCTTCACACACAATGGAGCCCAGGAG |          |
| PKC $\delta$ Fs   | GGGCTACGTTTTATGCAGCT               | 700      |
| PKC $\delta$ Rs   | AGCAGGTCTGGGAGCTCACT               |          |
| PKC $\alpha$ Fs   | TGAACCCTCAGTGGAAATGAGT             | 325      |
| PKC $\alpha$ Rs   | GGCTGCTTCCTGTCTTCTGAA              |          |
| PKC $\epsilon$ Fs | CCACCAAGCAGAAGACCAAC               | 466      |
| PKC $\epsilon$ Rs | TTTGTGGACGACGCAGGTAC               |          |
| PKC $\eta$ Fs     | GAAGGAGAGTCCATCAAGTC               | 497      |
| PKC $\eta$ Rs     | TCAGCGTAGACCTGGAAATG               |          |
| PKC $\zeta$ Fs    | GGGACGAAAGTGCTCATCATC              | 541      |
| PKC $\zeta$ Rs    | GAGGACCTTGGCATAGCTTC               |          |
| PKC $\lambda$ Fs  | GCAGTGAGGTTCGAGATATG               | 380      |
| PKC $\lambda$ Rs  | CCAGCAGTTTGCAGTTGATG               |          |
| GAPDH Fs          | CAATGCATCCTGCACCACCAAC             | 320      |
| GAPDH Rs          | CATACTTGGCAGGTTTCTCCAG             |          |
| PKC $\delta$ Fq   | TAAGCCCAAAGTGAAATCCC               | 138      |
| PKC $\delta$ Rq   | ACAAAAGGAGAAGCCCTTGAA              |          |
| $\beta$ -actin Fq | ATCGCTGACAGGATGCAGAAG              | 76       |
| $\beta$ -actin Rq | TCAGGAGGAGCAATGATCTTGA             |          |
| Methylated F      | CGTAAGTAGTTGGGGAAGTTTC             | 230      |
| Methylated R      | CACGAAAATAAAAAAT CCGAC             |          |
| Unmethylated F    | GGTGTAAGTAGTTGGGGAAGTTTT           | 233      |
| Unmethylated R    | CCACAAAAATAAAAAATCC AAC            |          |
| ChIP F            | ACAAGCCAGCAGGAAGAGGA               | 163      |
| ChIP R            | TTATAGAGGAGGACTCCGAGGC             |          |

F, Forward; R, Reverse; g, genomic PCR for cloning the rat PKC $\delta$  promoter; s, semiquantitative RT-PCR; q, quantitative RT-PCR.

**Supplemental Table 2: Sense sequences of the oligonucleotides used in EMSAs.**

| <b>Probe/Competitor</b> | <b>Sense oligonucleotide (5'-3')</b> |
|-------------------------|--------------------------------------|
| PkcδNFκB1               | GTAGTTGGGGAAGCCCGCC (-20 to -8)      |
| PkcδNFκB1 mutant        | GTAGTT <b>agct</b> AAGCCCGCC         |
| PkcδNFκB2               | GCCAGTGGGGAGTCCCGGGC (-51 to -39)    |
| PkcδNFκB2 mutant        | GCCAGT <b>agct</b> AGTCCCGGGC        |
| NFκB consensus          | AGTTGAGGGGACTTCCAGGC                 |
| AP-1                    | CGCTTGATGACTCAGCCGAA                 |

Nucleotide sequences of the consensus binding motif are underlined. The localizations of the PKCδ NFκB sites, relative to the transcription start site, are shown. Mutated base pairs in mutant oligos are highlighted in bold and in lowercase.
